# Supplementary material for: A stethoscope for the ocean: Unknownness-aware monitoring under false-positives-per-hour constraints in underwater soundscapes
Source: Research Square preprint supplement (doi:10.21203/rs.3.rs-8570649/v1), 2026-02-13
Supplement: Supplementary file 1 [file fe9234c65c1cda63f25c101f.docx]

**Supplementary Fig. S1 | ROC and precision–recall curves for CCED2 on DCLDE2013.**

(a) Receiver operating characteristic (ROC) and (b) precision–recall (PR) curves for the CCED2 unknownness score on the DCLDE2013 Test set, treating OOD (unknown; Out) segments as the positive class. The CCED2 threshold was tuned on the development set (2009-03-28–2009-03-31) and evaluated on the held-out test set (2009-04-01–2009-04-03) using 10-s segments. CCED2 attains AUROC = 1.000000 and AUPR(Out) = 1.000000, resulting in almost step-like ROC and PR curves. This behaviour is consistent with the (near-)disjoint InD/OOD score distributions shown in Fig. 3 of the main text.

**Supplementary Table S1 | Energy-based variants on DCLDE2013 Test (BEATs+DAPT)**
Energy-based scores (Energy_z) 32 are included for completeness. In our setting, energy is sensitive to score direction and class imbalance, and it is less effective for InD/OOD separation than the distance-based scores.

| **Score** | **AUROC** | **AUPR(Out)** | **AUPR(In)** | **sep (max InD < min OOD)** |
| --- | --- | --- | --- | --- |
| Energy_z | 0.492281 | 0.930862 | 0.120292 | False |
| CCED2 + Energy_z | 1.000000 | 1.000000 | 1.000000 | True |

** Computed under the same DCLDE2013 evaluation definition as Table 3 (InD reference: n = 1,623; OOD Test: n = 34,049; 10-s segments).*

**Supplementary Table S2 | Label taxonomy and dataset composition (totals) for the 56-class underwater sound event dataset used for SED training.**
The label taxonomy follows the category scheme introduced in Noda et al. (2024)11 (Biophony, Geophony, Anthrophony). For biological classes, the scientific name is provided separately from the common name and any dataset-internal call-type annotations (e.g., type A/B/C/D). Totals are reported at the 10 s-clip level: total hours were computed as the number of labelled 10 s clips multiplied by the fixed clip length (10 s). Classes 50–52 correspond to sounds recorded from green sea turtles (*Chelonia mydas*); two of these classes (50 and 52) contain fewer than 40 labelled clips due to historical dataset curation for short-window CNN training (2 s sampling within a 10 s clip), where multiple event-like instances can occur within a single clip.

| idx | Level 1 | Level 2 | Scientific name | Common name / note | total clips | total hours |
| --- | --- | --- | --- | --- | --- | --- |
| 0 | Biophony | Fish | *Myripristis berndti* | soldierfish | 208 | 0.578 |
| 1 | Biophony | Fish | *Pseudanthias dispar* | anthias | 41 | 0.114 |
| 2 | Geophony | Noise |  | background noise | 253 | 0.703 |
| 3 | Biophony | Fish | *Lutjanus decussatus* | snapper | 49 | 0.136 |
| 4 | Biophony | Fish | *Chromis viridis* | blue-green chromis; type A | 233 | 0.647 |
| 5 | Biophony | Fish | *Chromis viridis* | blue-green chromis; type B | 321 | 0.892 |
| 6 | Anthrophony | Human |  | diver breathing | 140 | 0.389 |
| 7 | Anthrophony | Vessel |  | diver support boat | 87 | 0.242 |
| 8 | Biophony | Fish | *Gymnothorax javanicus* | giant moray | 229 | 0.636 |
| 9 | Anthrophony | Vessel |  | small workboat / drone-like vessel | 110 | 0.306 |
| 10 | Biophony | Mammal | *Dugong dugon* | dugong; type A | 140 | 0.389 |
| 11 | Biophony | Mammal | *Dugong dugon* | dugong; type B | 40 | 0.111 |
| 12 | Biophony | Fish | *Pseudanthias evansi* | anthias | 118 | 0.328 |
| 13 | Anthrophony | Vessel |  | ferry | 107 | 0.297 |
| 14 | Biophony | Fish | *Dascyllus aruanus* | humbug damselfish; type A | 54 | 0.15 |
| 15 | Biophony | Fish | *Plotosus spp.* | striped eel catfish | 441 | 1.225 |
| 16 | Biophony | Fish | *Amphiprion frenatus* | tomato clownfish | 49 | 0.136 |
| 17 | Anthrophony | Construction |  | underwater hammer | 106 | 0.294 |
| 18 | Biophony | Fish | *Chaetodon unimaculatus* | teardrop butterflyfish | 128 | 0.356 |
| 19 | Anthrophony | Vessel |  | patrol boat | 140 | 0.389 |
| 20 | Anthrophony | Vessel |  | cargo ship | 50 | 0.139 |
| 21 | Biophony | Fish | *Zoramia leptacanthus* | glass cardinalfish | 138 | 0.383 |
| 22 | Biophony | Mammal | *Globicephala macrorhynchus* | short-finned pilot whale; type A | 134 | 0.372 |
| 23 | Anthrophony | Vessel |  | pleasure / small coastal boat | 101 | 0.281 |
| 24 | Biophony | Fish | *Myripristis kuntee* | soldierfish; type A | 54 | 0.15 |
| 25 | Biophony | Fish | *Myripristis kuntee* | soldierfish; type B | 66 | 0.183 |
| 26 | Biophony | Fish | *Stegastes nigricans* | dusky damselfish; type A | 58 | 0.161 |
| 27 | Biophony | Fish | *Stegastes nigricans* | dusky damselfish; type B | 138 | 0.383 |
| 28 | Biophony | Mammal | *Globicephala macrorhynchus* | short-finned pilot whale; type B | 45 | 0.125 |
| 29 | Biophony | Fish | *Neoniphon sammara* | squirrelfish; type A | 85 | 0.236 |
| 30 | Biophony | Mammal | *Tursiops aduncus* | Indo-Pacific bottlenose dolphin | 56 | 0.156 |
| 31 | Biophony | Fish | *Dascyllus aruanus* | humbug damselfish; type B | 94 | 0.261 |
| 32 | Biophony | Fish | *Dascyllus aruanus* | humbug damselfish; type C | 162 | 0.45 |
| 33 | Biophony | Fish | *Dascyllus aruanus* | humbug damselfish; type D | 75 | 0.208 |
| 34 | Biophony | Fish | *Centropyge vrolikii* | angelfish | 133 | 0.369 |
| 35 | Biophony | Fish | *Acanthurus dussumieri* | surgeonfish | 54 | 0.15 |
| 36 | Biophony | Fish | *Pomacentrus amboinensis* | amber damsel; type A | 62 | 0.172 |
| 37 | Biophony | Fish | *Pomacentrus amboinensis* | amber damsel; type B | 131 | 0.364 |
| 38 | Geophony | Rain |  | rain | 172 | 0.478 |
| 39 | Biophony | Fish | *Abudefduf sexfasciatus* | sergeant major; type A | 103 | 0.286 |
| 40 | Biophony | Fish | *Abudefduf sexfasciatus* | sergeant major; type B | 98 | 0.272 |
| 41 | Biophony | Fish | *Chrysiptera cyanea* | blue damselfish; type A | 225 | 0.625 |
| 42 | Biophony | Fish | *Chrysiptera cyanea* | blue damselfish; type B | 1762 | 4.894 |
| 43 | Biophony | Mammal | *Tursiops truncatus* | common bottlenose dolphin | 103 | 0.286 |
| 44 | Biophony | Mammal | *Globicephala macrorhynchus* | short-finned pilot whale; type C | 105 | 0.292 |
| 45 | Anthrophony | Vessel |  | tanker | 100 | 0.278 |
| 46 | Biophony | Mammal | *Pseudorca crassidens* | false killer whale | 102 | 0.283 |
| 47 | Anthrophony | Vessel |  | regular service vessel | 124 | 0.344 |
| 48 | Anthrophony | Vessel |  | tugboat | 101 | 0.281 |
| 49 | Biophony | Fish | *Neoniphon sammara* | squirrelfish; type B | 67 | 0.186 |
| 50 | Biophony | Reptile | *Chelonia mydas* | green sea turtle; breath | 24 | 0.067 |
| 51 | Biophony | Reptile | *Chelonia mydas* | green sea turtle; flipper stroke | 53 | 0.147 |
| 52 | Biophony | Reptile | *Chelonia mydas* | green sea turtle; collision/impact | 8 | 0.022 |
| 53 | Geophony | Wave |  | wave | 148 | 0.411 |
| 54 | Biophony | Mammal | *Megaptera novaeangliae* | humpback whale; type A | 127 | 0.353 |
| 55 | Biophony | Mammal | *Megaptera novaeangliae* | humpback whale; type B | 60 | 0.167 |
|  |  |  |  | TOTAL | 8112 | 22.533 |

**Supplementary Table S3 | Sensitivity to tolerance (±15 s vs ±20 s) in the HICEAS multi-species sanity check using unknownness scores**
Macro- and micro-averaged Precision, recall, F1 and FP/h when using ŝ = −kNN_z, −Mahalanobis_z, or −CCED2 as the detection score in the HICEAS multi-species evaluation (DNS protocol, q = 0.99, K = 2, using --tail low to select the bottom (1−q) fraction because higher unknownness corresponds to lower ŝ for these negated-distance scores). This table is an unknownness-only sanity check; the main operational policy comparison uses tolerance ±15 s and is reported in Table 6.

| **Score** | **Split** | **P** | **R** | **F1** | **FP/h** |
| --- | --- | --- | --- | --- | --- |
| **BEATs+DAPT embeddings (this work)** |  |  |  |  |  |
| -kNN_z | macro@15 | 0.5000 | 0.3204 | 0.3429 | 1.4286 |
| -kNN_z | micro@15 | 0.5000 | 0.2000 | 0.2857 | 1.4286 |
| -kNN_z | macro@20 | 0.5000 | 0.3204 | 0.3429 | 1.4286 |
| -kNN_z | micro@20 | 0.5000 | 0.2000 | 0.2857 | 1.4286 |
| -Mahalanobis_z | macro@15 | 0.5000 | 0.3065 | 0.3577 | 1.4286 |
| -Mahalanobis_z | micro@15 | 0.4706 | 0.1778 | 0.2581 | 1.4286 |
| -Mahalanobis_z | macro@20 | 0.5000 | 0.3065 | 0.3577 | 1.4286 |
| -Mahalanobis_z | micro@20 | 0.4706 | 0.1778 | 0.2581 | 1.4286 |
| -CCED2 | macro@15 | 0.5000 | 0.3204 | 0.3429 | 1.4286 |
| -CCED2 | micro@15 | 0.5000 | 0.2000 | 0.2857 | 1.4286 |
| -CCED2 | macro@20 | 0.5000 | 0.3204 | 0.3429 | 1.4286 |
| -CCED2 | micro@20 | 0.5000 | 0.2000 | 0.2857 | 1.4286 |
| **Perch 2.0 embeddings (win10; no underwater DAPT; baseline)** |  |  |  |  |  |
| -kNN_z | macro@15 | 0.1852 | 0.0833 | 0.1145 | 1.9048 |
| -kNN_z | micro@15 | 0.2500 | 0.0889 | 0.1311 | 1.9048 |
| -kNN_z | macro@20 | 0.2963 | 0.1204 | 0.1700 | 1.7460 |
| -kNN_z | micro@20 | 0.3125 | 0.1111 | 0.1639 | 1.7460 |
| -Mahalanobis_z | macro@15 | 0.2407 | 0.0944 | 0.1336 | 1.9048 |
| -Mahalanobis_z | micro@15 | 0.2941 | 0.1111 | 0.1613 | 1.9048 |
| -Mahalanobis_z | macro@20 | 0.3519 | 0.1315 | 0.1891 | 1.7460 |
| -Mahalanobis_z | micro@20 | 0.3529 | 0.1333 | 0.1935 | 1.7460 |
| -CCED2 | macro@15 | 0.2407 | 0.0972 | 0.1367 | 1.7460 |
| -CCED2 | micro@15 | 0.3125 | 0.1111 | 0.1639 | 1.7460 |
| -CCED2 | macro@20 | 0.3519 | 0.1343 | 0.1923 | 1.5873 |
| - CCED2 | micro@20 | 0.3750 | 0.1333 | 0.1967 | 1.5873 |

** Perch “win10” uses 10-s window embeddings extracted with start_sec = center_sec - 5 and duration_sec = 10.*

***†*** *Sanity-check note (BEATs+DAPT): The per-window prediction scores differ between −kNN_z and −CCED2 (max |Δŝ| = 10.88, Pearson r = 0.888). Under the DNS protocol at q = 0.99 (K = 2), detections are selected from the lowest-score tail of ŝ (--tail low), and the selected bottom 1% windows are identical for −kNN_z and −CCED2 (Jaccard = 1.00, n = 568), yielding identical macro/micro aggregates.*
